# Supplementary material for: ADAM17-dependent signaling is required for oncogenic human papillomavirus entry platform assembly
Source: eLife journal article supplement (doi:10.7554/elife.44345), 2019-05-20
Supplement: supp [file elife-44345-supp-v1.zip]

Archive with 10 entries (10 files):
- elife_poa_e44345_Figure_1_figure_supplement_2.pdf
- elife_poa_e44345_Figure_6_figure_supplement_1.pdf
- elife_poa_e44345_Figure_4_figure_supplement_1.pdf
- elife_poa_e44345_Figure_2_figure_supplement_2.pdf
- elife_poa_e44345_Figure_2_figure_supplement_1.pdf
- elife_poa_e44345_Transparent_Reporting_File.pdf
- elife_poa_e44345_Figure_2_figure_supplement_4.pdf
- elife_poa_e44345_Figure_1_figure_supplement_1.pdf
- elife_poa_e44345_Figure_7_figure_supplement_1.pdf
- elife_poa_e44345_Figure_2_figure_supplement_3.pdf
