# Supplementary figures and images for: ADAM17-dependent signaling is required for oncogenic human papillomavirus entry platform assembly
Source: eLife journal article supplement (doi:10.7554/elife.44345), 2019-05-20

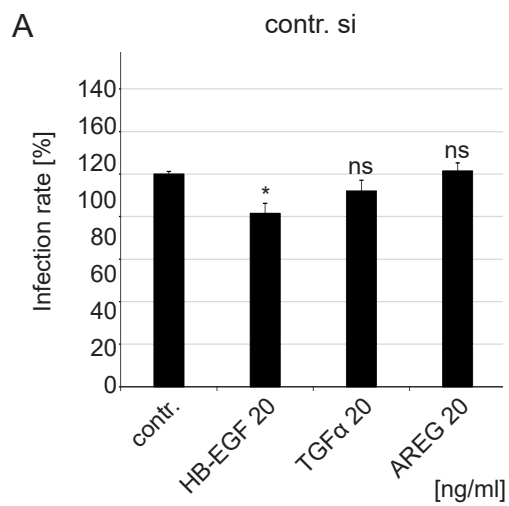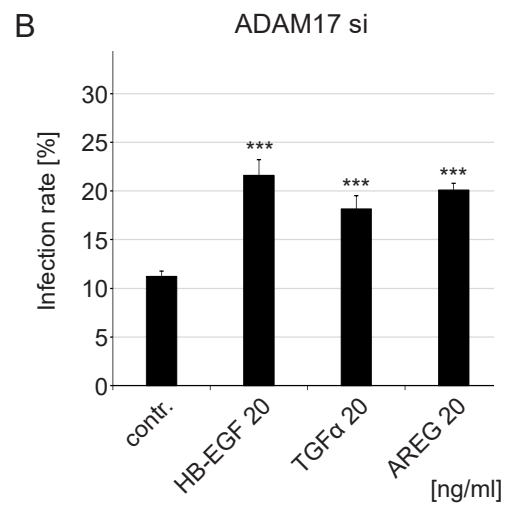

Supplement: supp [file elife-44345-supp-v1.zip]

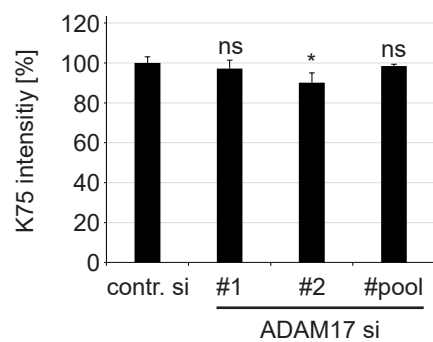

Supplement: supp [file elife-44345-supp-v1.zip]

**A**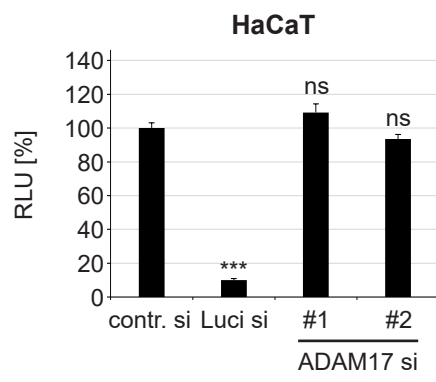**B**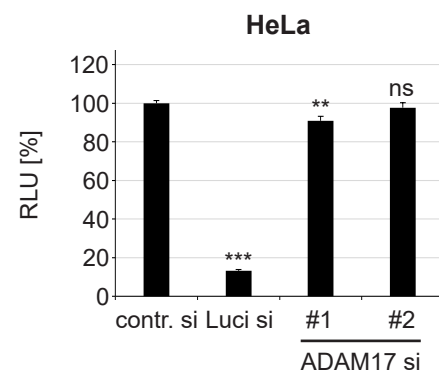

Supplement: supp [file elife-44345-supp-v1.zip › elife_poa_e44345_Figure_1_figure_supplement_2.pdf]

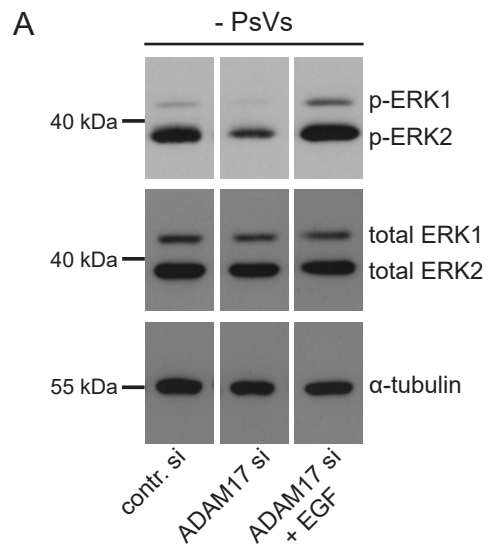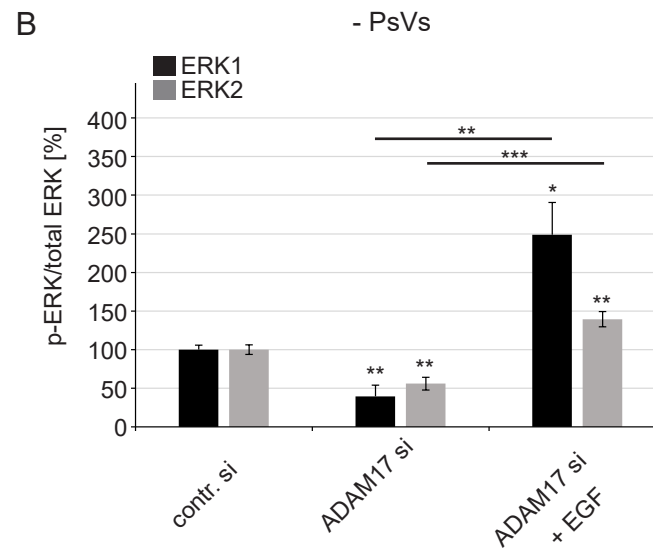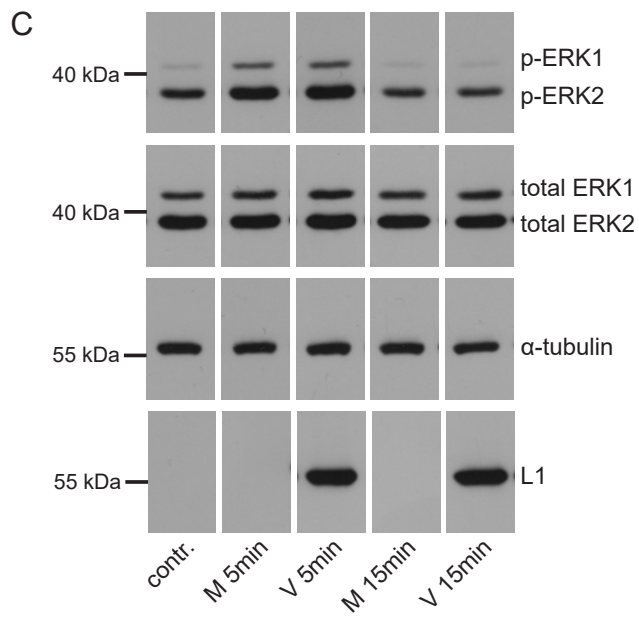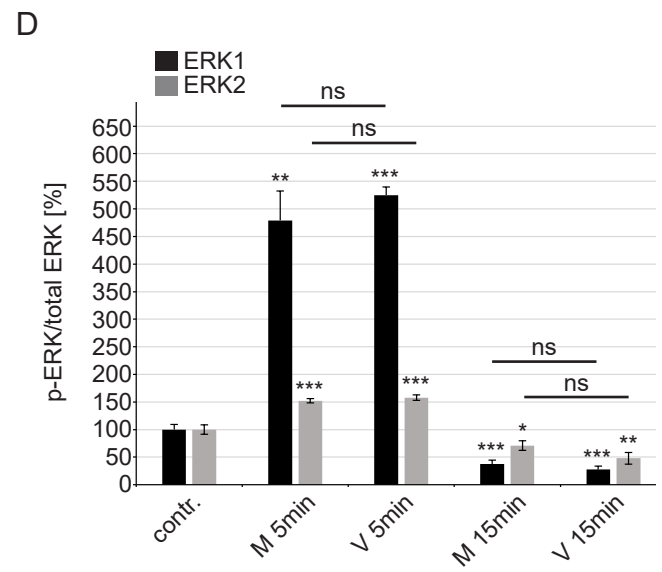

Supplement: supp [file elife-44345-supp-v1.zip › elife_poa_e44345_Figure_6_figure_supplement_1.pdf]

**A**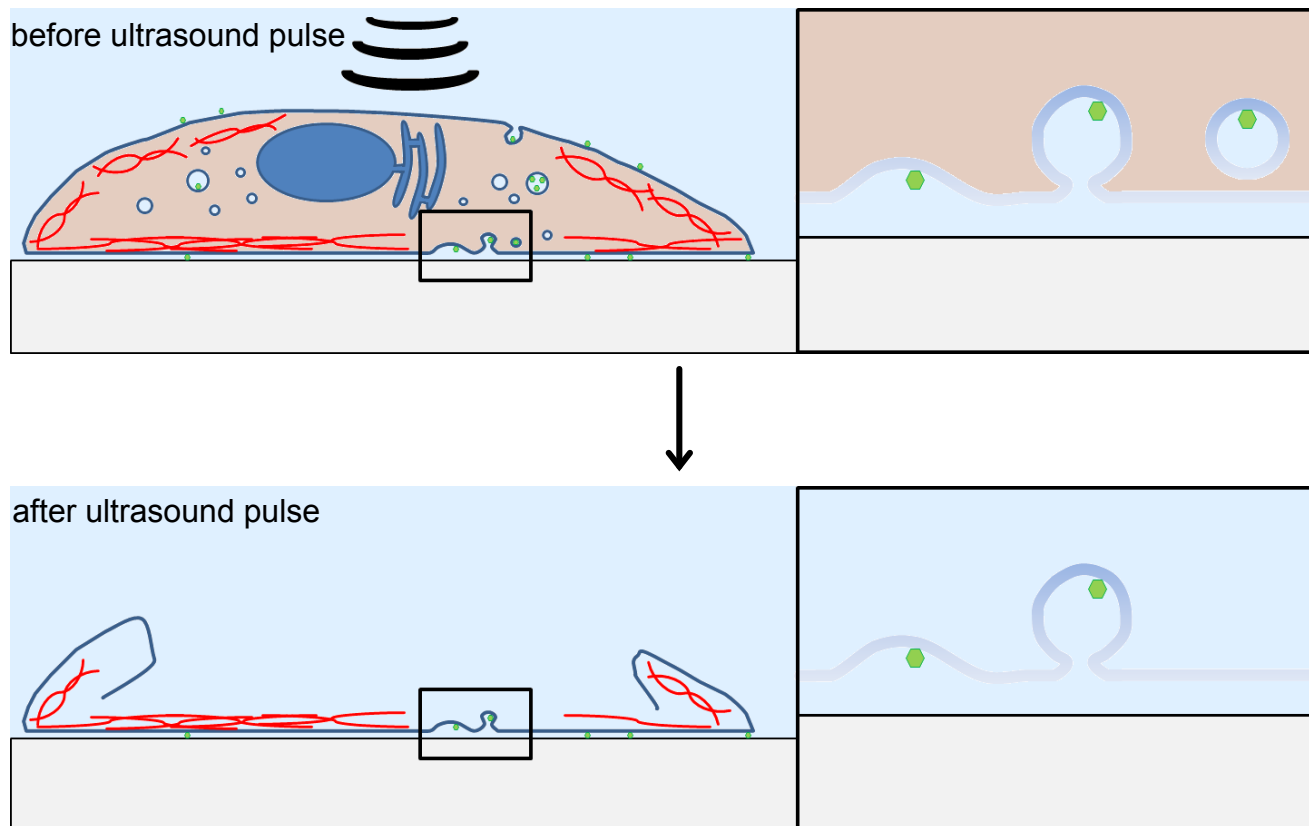**B**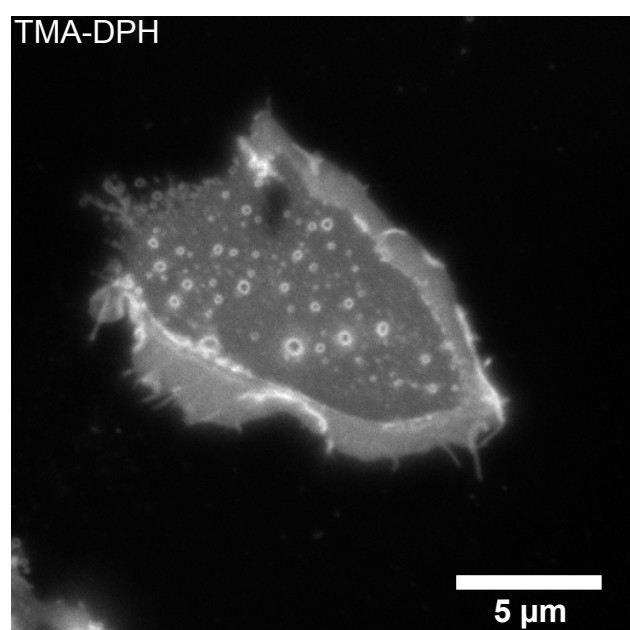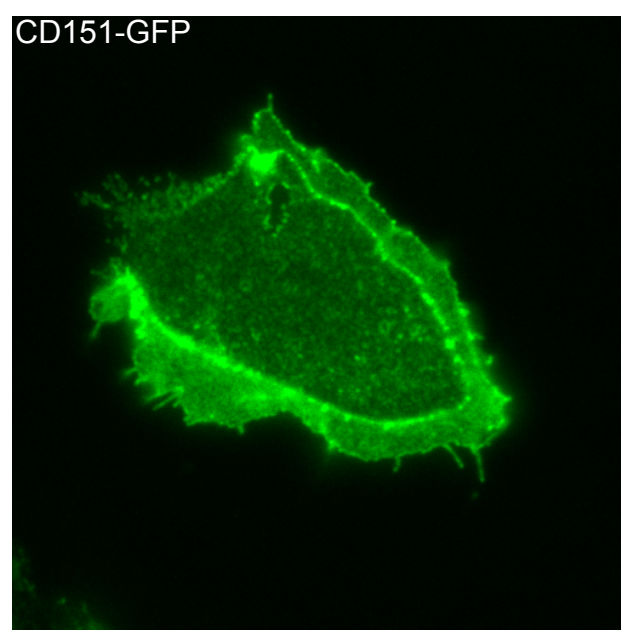

Supplement: supp [file elife-44345-supp-v1.zip › elife_poa_e44345_Figure_4_figure_supplement_1.pdf]

**A**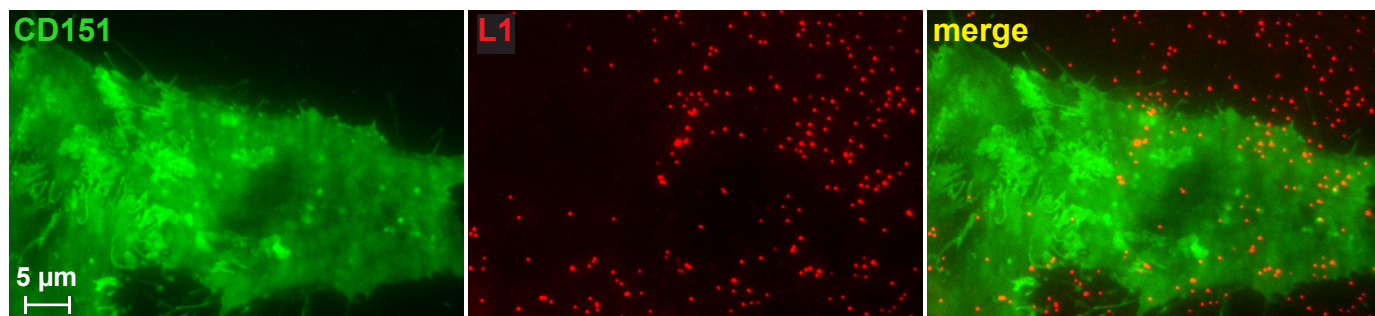**B**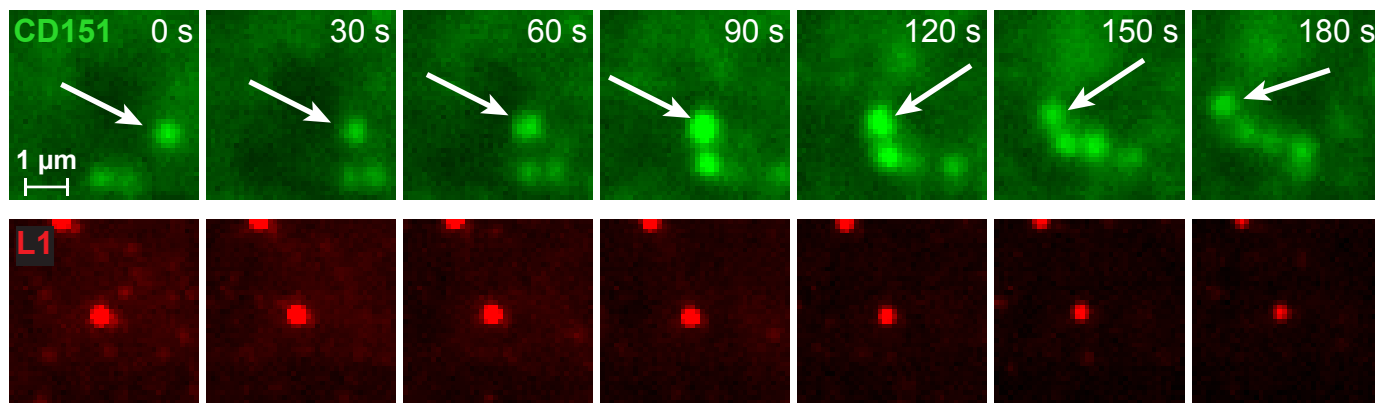**C**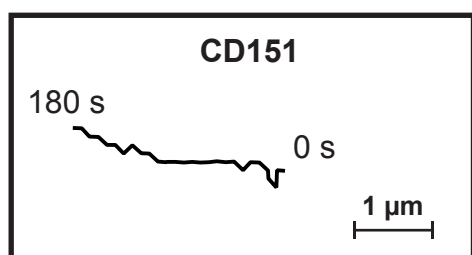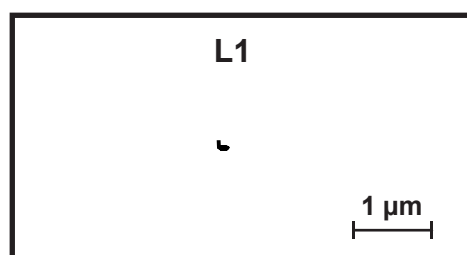**D**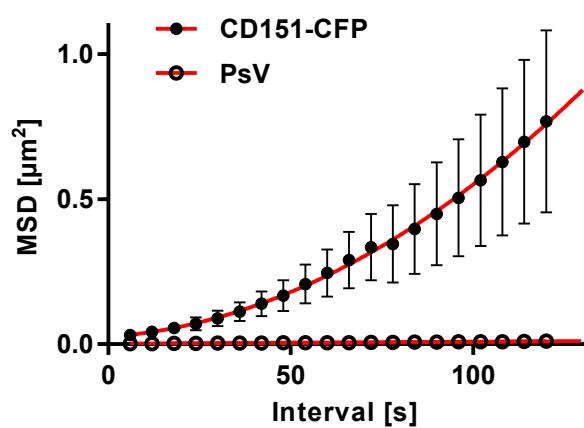**E**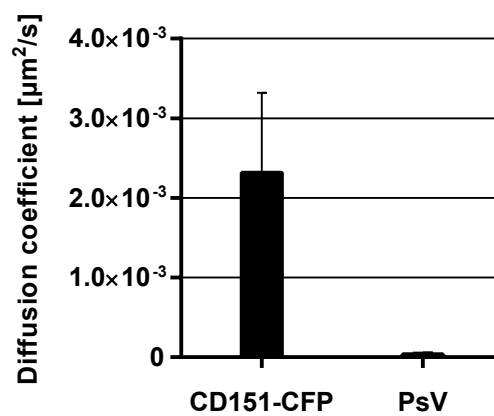

Supplement: supp [file elife-44345-supp-v1.zip › elife_poa_e44345_Figure_2_figure_supplement_2.pdf]

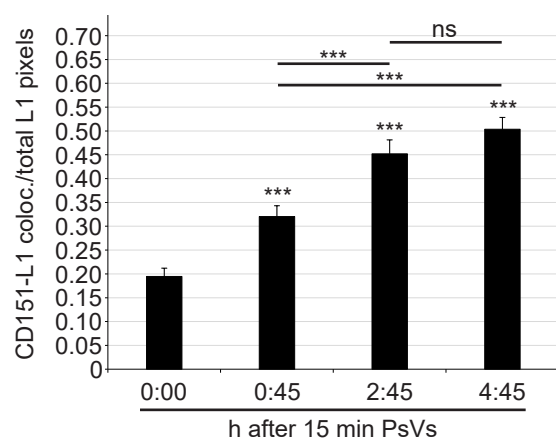

Supplement: supp [file elife-44345-supp-v1.zip › elife_poa_e44345_Figure_2_figure_supplement_1.pdf]

A

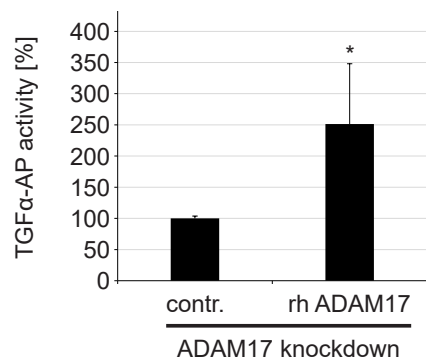

B

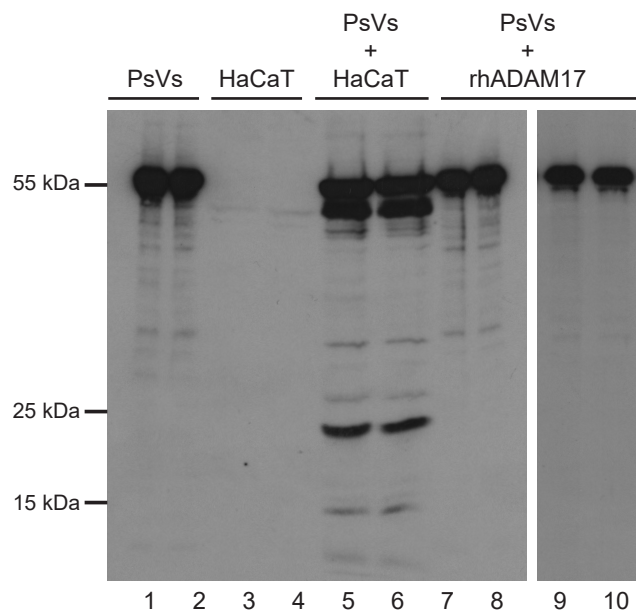

C

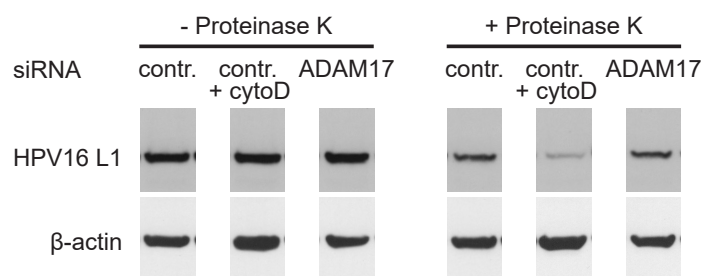

D

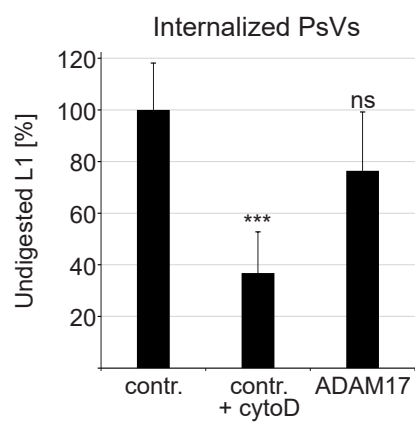

E

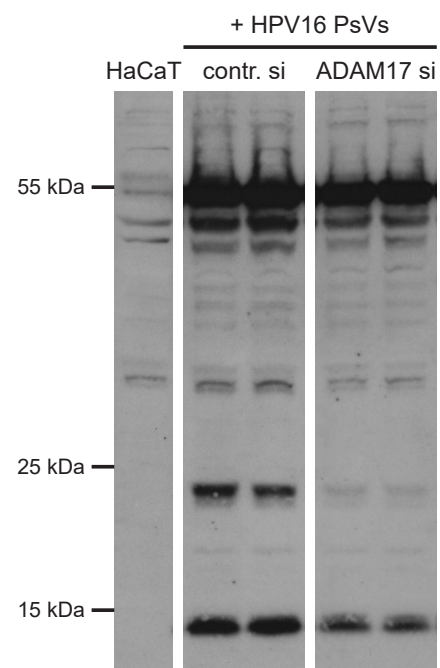

F

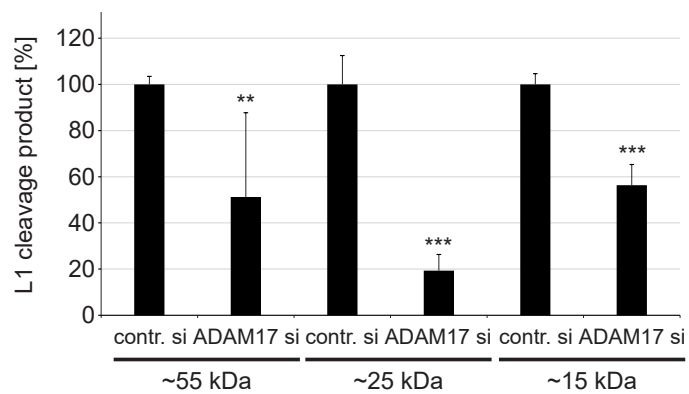

Supplement: supp [file elife-44345-supp-v1.zip › elife_poa_e44345_Figure_2_figure_supplement_4.pdf]

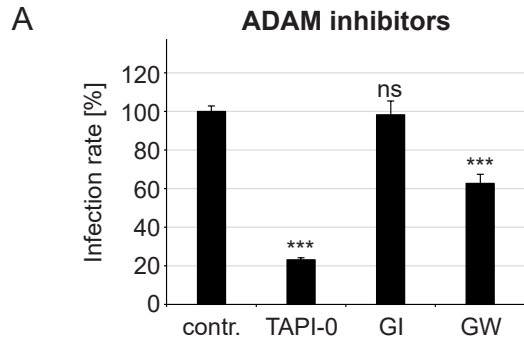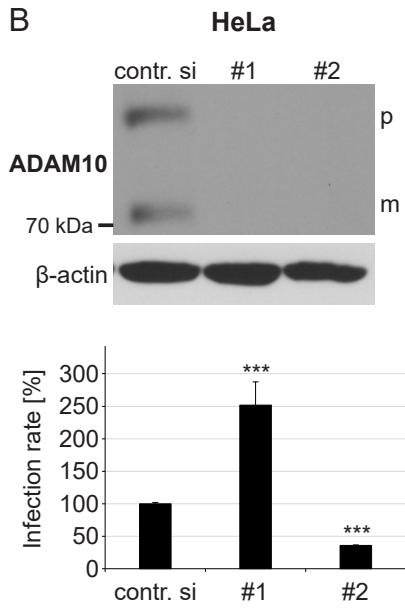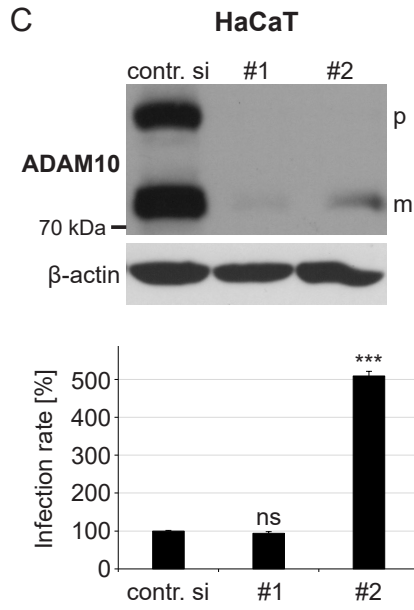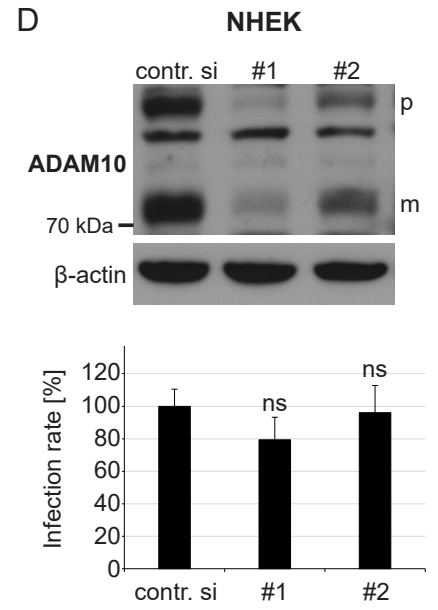

Supplement: supp [file elife-44345-supp-v1.zip › elife_poa_e44345_Figure_1_figure_supplement_1.pdf]
